# Supplementary material for: Health Awareness in Marginalised Urban Settings: Understanding Communicable and Non-Communicable Disease Knowledge in Southern India
Source: Research Square preprint supplement (doi:10.21203/rs.3.rs-8208997/v1), 2026-01-16
Supplement: Supplementary file 1 [file c6d63525eb1725d2afd1345f.docx]

**KNOWLEDGE AND RISK PERCEPTION OF COMMON COMMUNICABLE AND NON‑COMMUNICABLE DISEASES AMONG URBAN SLUM COMMUNITIES IN SOUTHERN INDIA**

**INTERVIEW DETAILS *(to be completed by study staff)***

**Date of interview**:____ ____/____ ____/____ ____ ____ ____

|  |  |  |  |  |
| --- | --- | --- | --- | --- |

***Name of the Interviewer****:*

***UPID number****:*

(Same UPID recorded on the participant consent form)

**Name of the participant**: _____________________________________________________

|  |  |  |  |
| --- | --- | --- | --- |
|  |  |  |  |
| h | h | m | m |

**Time of interview**: Start time

(Record time in 24 hours’ format) End time

**Parent’s Mobile Number**: (1)

(2)

**Status of the interview?** *(To be recorded after completion of the interview)*

□ Completed

□ Incomplete

□ Refused

If refused, please indicate why:

**Date of checking:** ___ ___/___ ___/ ___ ___

**Supervisor initials**:

**Comments**:

1. **SOCIO-DEMOGRAPHIC CHARACTERISTICS**

| **A** | **Socio-demographics** | **Skip** |
| --- | --- | --- |
| **A1** | **How old are you?** *(Record age in completed years)* |  |
|  | Age in completed years |  |
| **A2** | **Record the gender of the respondent.** *(Do not readout)* |  |
|  | a. Male |  |
|  | b. Female |  |
|  | c. Transgender |  |
| **A3** | **What is your current marital status?** |  |
|  | a. Never married |  |
|  | b. Currently married |  |
|  | c. Divorced/Separated |  |
|  | d. Widowed |  |
|  | e. Others, please specify _________________________ |  |
|  | f. Refused to answer |  |
| **A4** | **Till what class have you studied?** *(Do not prompt, record as appropriate)* |  |
|  | a. Never been to school |  |
|  | b. Class 1 to 5 |  |
|  | c. Class 6 to 12 |  |
|  | d. Technical school |  |
|  | e. College or more |  |
|  | f. Refused to answer |  |
| **A5** | **What work do you currently do?** *(Do not prompt, record as appropriate)* |  |
|  | a. Unemployed/Not working/Housewife |  |
|  | b. Daily wage labourer |  |
|  | c. Small business/Self employed |  |
|  | d. Farmer/Agricultural labourer |  |
|  | e. Salaried – Private job |  |
|  | f. Salaried – Government job |  |
|  | g. Others, please specify _________________________ |  |
|  | h. Refused to answer |  |

1. **KNOWLEDGE AND RISK PERCEPTION**

| **I will now ask you a few questions about non‑communicable diseases – these are illnesses that do not spread from one person to another. Please listen carefully and give me the response you feel is most accurate.** | | |
| --- | --- | --- |
| **A** | **Diabetes** | **Skip** |
| **A1** | **Please tell me, how much you know about Diabetes?** | *If Nothing at all, skip A2,A3,A4,A5,A6* |
|  | a. Nothing at all |  |
|  | b. I have only heard the term before |  |
|  | c. I know a little |  |
|  | d. I am very familiar with it |  |
| **A2** | **Is there any of your family members/close relatives (parents/siblings) diagnosed with Diabetes?** |  |
|  | a. Yes |  |
|  | b. No |  |
|  | c. Don’t know |  |
| **A3** | **According to you which of the following may cause diabetes** |  |
|  | a. Smoking |  |
|  | b. Chewing tobacco |  |
|  | c. Alcohol |  |
|  | d. Unhealthy diet |  |
|  | e. Lack of physical activity |  |
| **A4** | **In the past 1 month, have you received any information regarding prevention or control of diabetes from the following sources?** |  |
|  | a. Mass media (Tv, newspaper, billboards and advertisements) |  |
|  | b. Doctor or Health professionals |  |
|  | c. Advice from family member or friend |  |
|  | d. Others, please specify |  |
|  | e. No information from any source |  |
| **A5** | **How likely do you think it is that you will develop diabetes in the next 10 years?** |  |
|  | a. Don’t know |  |
|  | b. Less Likely |  |
|  | c. Moderately Likely |  |
|  | d. Extremely Likely |  |
| **A6** | **How serious it would be for you if you develop diabetes in the next year?** |  |
|  | a. Don’t know |  |
|  | b. Less serious |  |
|  | c. Moderately serious |  |
|  | d. Extremely serious |  |
|  |  |  |
| **B** | **High Blood Pressure** |  |
| **B1** | **Please tell me, how much you know about High Blood Pressure?** | *If Nothing at all, skip*  *D2,D3,D4,D5,D6* |
|  | a. Nothing at all |  |
|  | b. I have only heard the term before |  |
|  | c. I know a little |  |
|  | d. I am very familiar with it |  |
| **B2** | **Is there any of your family members/close relatives (parents/siblings) diagnosed with High Blood Pressure** |  |
|  | a. Yes |  |
|  | b. No |  |
|  | c. Don’t know |  |
| **B3** | **According to you which of the following my cause High Blood Pressure?** |  |
|  | a. Smoking |  |
|  | b. Chewing tobacco |  |
|  | c. Alcohol |  |
|  | d. Unhealthy diet |  |
|  | e. Lack of physical activity |  |
| **B4** | **In the past 1 month, have you received any information regarding prevention or control of High Blood Pressure from the following sources?** |  |
|  | a. Mass media (Tv, newspaper, billboards and advertisements) |  |
|  | b. Doctor or Health professionals |  |
|  | c. Advice from family member or friend |  |
|  | d. Others, please specify |  |
|  | e. No information from any source |  |
| **B5** | **How likely do you think it is that you will develop High Blood Pressure in the next 10 years?** |  |
|  | a. Don’t know |  |
|  | b. Less Likely |  |
|  | c. Moderately Likely |  |
|  | d. Extremely Likely |  |
| **B6** | **How serious it would be for you if you develop High Blood Pressure in the next year?** |  |
|  | a. Don’t know |  |
|  | b. Less serious |  |
|  | c. Moderately serious |  |
|  | d. Extremely serious |  |
|  |  |  |
| **C** | **Cancer** |  |
| **C1** | **Please tell me, how much you know about Cancer?** | *If Nothing at all, skip*  *F2,F3,F4,F5,F6* |
|  | a. Nothing at all |  |
|  | b. I have only heard the term before |  |
|  | c. I know a little |  |
|  | d. I am very familiar with it |  |
| **C2** | **Is there any of your family members/close relatives (parents/siblings) diagnosed with Cancer?** |  |
|  | a. Yes |  |
|  | b. No |  |
|  | c. Don’t know |  |
| **C3** | **According to you which of the following my cause Cancer?** |  |
|  | a. Smoking |  |
|  | b. Chewing tobacco |  |
|  | c. Alcohol |  |
|  | d. Unhealthy diet |  |
|  | e. Lack of physical activity |  |
| **C4** | **In the past 1 month, have you received any information regarding prevention or control of Cancer from the following sources?** |  |
|  | a. Mass media (Tv, newspaper, billboards and advertisements) |  |
|  | b. Doctor or Health professionals |  |
|  | c. Advice from family member or friend |  |
|  | d. Others, please specify |  |
|  | e. No information from any source |  |
| **C5** | **How likely do you think it is that you will develop Cancer in the next 10 years?** |  |
|  | a. Don’t know |  |
|  | b. Less Likely |  |
|  | c. Moderately Likely |  |
|  | d. Extremely Likely |  |
| **C6** | **How serious it would be for you if you develop Cancer in the next year?** |  |
|  | a. Don’t know |  |
|  | b. Less serious |  |
|  | c. Moderately serious |  |
|  | d. Extremely serious |  |
|  |  |  |
| **D** | **Depression** |  |
| **D1.** | **Please tell me, how much you know about Depression?** | *If Nothing at all, skip*  *G2,G3,G4,G5* |
|  | a. Nothing at all |  |
|  | b. I have only heard the term before |  |
|  | c. I know a little |  |
|  | d. I am very familiar with it |  |
| **D2** | **Is there any of your family members/close relatives (parents/siblings) diagnosed with Depression?** |  |
|  | a. Yes |  |
|  | b. No |  |
|  | c. Don’t know |  |
| **D3** | **In the past 1 month, have you received any information regarding prevention or control of Depression from the following sources?** |  |
|  | a. Mass media (Tv, newspaper, billboards and advertisements) |  |
|  | b. Doctor or Health professionals |  |
|  | c. Advice from family member or friend |  |
|  | d. Others, please specify |  |
|  | e. No information from any source |  |
| **D4** | **How likely do you think it is that you will develop Depression in the next 10 years?** |  |
|  | a. Don’t know |  |
|  | b. Less Likely |  |
|  | c. Moderately Likely |  |
|  | d. Extremely Likely |  |
| **D5** | **How serious it would be for you if you develop Depression in the next year?** |  |
|  | a. Don’t know |  |
|  | b. Less serious |  |
|  | c. Moderately serious |  |
|  | d. Extremely serious |  |
|  |  |  |
| **I will now ask you a few questions about communicable diseases – these are illnesses that do spread from one person to another. Please listen carefully and give me the response you feel is most accurate.** | | |
| **E** | **Malaria** |  |
| **E1** | **In the past 1 month, have you received any information regarding prevention or control of Malaria from the following sources?** |  |
|  | a. Mass media (Tv, newspaper, billboards and advertisements) |  |
|  | b. Doctor or Health professionals |  |
|  | c. Advice from family member or friend |  |
|  | d. Others, please specify |  |
|  | e. No information from any source |  |
| **E2** | **How likely do you think it is that you will develop Malaria in the next 10 years?** |  |
|  | a. Don’t know |  |
|  | b. Less Likely |  |
|  | c. Moderately Likely |  |
|  | d. Extremely Likely |  |
| **E3** | **How serious it would be for you if you develop Malaria in the next year?** |  |
|  | a. Don’t know |  |
|  | b. Less serious |  |
|  | c. Moderately serious |  |
|  | d. Extremely serious |  |
| **E4** | **According to you which of the following my cause Malaria?** |  |
|  | a. Mosquitoes bites |  |
|  | b. Unclean surroundings |  |
|  | c. Water stagnation |  |
|  | d. Poor personal hygiene |  |
|  |  |  |
| **F** | **Tuberculosis** |  |
| **F1** | **In the past 1 month, have you received any information regarding prevention or control of Tuberculosis from the following sources?** |  |
|  | a. Mass media (Tv, newspaper, billboards and advertisements) |  |
|  | b. Doctor or Health professionals |  |
|  | c. Advice from family member or friend |  |
|  | d. Others, please specify |  |
|  | e. No information from any source |  |
| **F2** | **How likely do you think it is that you will develop Tuberculosis in the next 10 years?** |  |
|  | a. Don’t know |  |
|  | b. Less Likely |  |
|  | c. Moderately Likely |  |
|  | d. Extremely Likely |  |
| **F3** | **How serious it would be for you if you develop Tuberculosis in the next year?** |  |
|  | a. Don’t know |  |
|  | b. Less serious |  |
|  | c. Moderately serious |  |
|  | d. Extremely serious |  |
| **F4** | **According to you which of the following my cause Tuberculosis?** |  |
|  | a. Contact with infected person |  |
|  | b. Smoking |  |
|  | c. Chewing tobacco |  |
|  | d. Alcohol |  |
|  | e. Unhealthy diet |  |
|  |  |  |
| **G** | **Diarrhoea** |  |
| **G1** | **In the past 1 month, have you received any information regarding prevention or control of Diarrhoea from the following sources?** |  |
|  | a. Mass media (Tv, newspaper, billboards and advertisements) |  |
|  | b. Doctor or Health professionals |  |
|  | c. Advice from family member or friend |  |
|  | d. Others, please specify |  |
|  | e. No information from any source |  |
| **G2** | **How likely do you think it is that you will develop Diarrhoea in the next 10 years?** |  |
|  | a. Don’t know |  |
|  | b. Less Likely |  |
|  | c. Moderately Likely |  |
|  | d. Extremely Likely |  |
| **G3** | **How serious it would be for you if you develop Diarrhoea in the next year?** |  |
|  | a. Don’t know |  |
|  | b. Less serious |  |
|  | c. Moderately serious |  |
|  | d. Extremely serious |  |
| **G4** | **According to you which of the following my cause Diarrhoea?** |  |
|  | a. Contaminated water |  |
|  | b. Unclean surroundings |  |
|  | c. Water stagnation |  |
|  | d. Poor personal hygiene |  |
|  |  |  |
| **H** | **Dengue** |  |
| **H1** | **In the past 1 month, have you received any information regarding prevention or control of Dengue from the following sources?** |  |
|  | a. Mass media (Tv, newspaper, billboards and advertisements) |  |
|  | b. Doctor or Health professionals |  |
|  | c. Advice from family member or friend |  |
|  | d. Others, please specify |  |
|  | e. No information from any source |  |
| **H2** | **How likely do you think it is that you will develop Dengue in the next 10 years?** |  |
|  | a. Don’t know |  |
|  | b. Less Likely |  |
|  | c. Moderately Likely |  |
|  | d. Extremely Likely |  |
| **H3** | **How serious it would be for you if you develop Dengue in the next year?** |  |
|  | a. Don’t know |  |
|  | b. Less serious |  |
|  | c. Moderately serious |  |
|  | d. Extremely serious |  |
| **H4** | **According to you which of the following my cause Dengue?** |  |
|  | a. Mosquitoes bites |  |
|  | b. Unclean surroundings |  |
|  | c. Water stagnation |  |
|  | d. Poor personal hygiene |  |
|  |  |  |
